# Supplementary material for: Pharmaceutical Pollution Alters the Structure of Freshwater Communities and Hinders Their Recovery from a Fish Predator
Source: PubMed Central journal article supplement (PMC11308527; doi:10.1021/acs.est.4c02807), 2024-07-25
Supplement: es4c02807_si_001.pdf [file es4c02807_si_001.pdf]

# **Supplementary material for: Pharmaceutical pollution alters the structure of freshwater communities and hinders their recovery from a fish predator**

Marcus Michelangeli<sup>1,2,3†</sup>, Jake M. Martin<sup>2,3,4</sup>, Stephanie Robson<sup>5</sup>, Daniel Cerveny<sup>2,6</sup>, Robert Walsh<sup>7</sup>, Erinn K. Richmond<sup>8</sup>, Michael R. Grace<sup>5</sup>, Jack A. Brand<sup>2,9</sup>, Michael G. Bertram<sup>2,3,4</sup>, Susie Ho<sup>3</sup>, Tomas Brodin<sup>2\*</sup>, Bob B.M. Wong<sup>3\*</sup>

<sup>1</sup> School of Environment and Science, Griffith University, Nathan 4111, Australia

<sup>2</sup> Department of Wildlife, Fish and Environmental Studies, Swedish University of Agricultural Sciences, Umeå 901 83, Sweden

<sup>3</sup> School of Biological Sciences, Monash University, Melbourne 3800, Australia

<sup>4</sup> Department of Zoology, Stockholm University, Stockholm 114 18, Sweden

<sup>5</sup> Water Studies Centre, School of Chemistry, Monash University, Melbourne 3800, Australia

<sup>6</sup> University of South Bohemia in Ceske Budejovice, Faculty of Fisheries and Protection of Waters, South Bohemian Research Center of Aquaculture and Biodiversity of Hydrocenoses, Zatisi 728/II, Vodnany, Czech Republic

<sup>7</sup> Australian Waterlife, 55 Vaughan Chase, Wyndham Vale, Victoria, 3024, Australia

<sup>8</sup> Environmental Protection Authority Victoria, EPA Science, Macleod, Victoria, 3085, Australia

<sup>9</sup> Institute of Zoology, Zoological Society of London, London NW1 4RY, United Kingdom

† Correspondence: [marcus.michelangeli@slu.se](mailto:marcus.michelangeli@slu.se) or [marcus.michelangeli@monash.edu](mailto:marcus.michelangeli@monash.edu)

\* Co-senior authors

**Summary:** 30 pages, 2 figures, 25 tables



## Supplementary material table of contents

| Section                                                                                                                                                                                                                                                        | Pages        |
|----------------------------------------------------------------------------------------------------------------------------------------------------------------------------------------------------------------------------------------------------------------|--------------|
| <b>1. Methods</b>                                                                                                                                                                                                                                              | <b>S5–S6</b> |
| <b>Table S1:</b> Mean ( $\pm$ standard deviation) temperature (Temp, °C), pH and dissolved oxygen (DO, mg/L) for each treatment and stage of the experiment.                                                                                                   | S5           |
| <b>Table S2:</b> Model structure, number of observations (n) and prior specification for each model used in the statistical analysis.                                                                                                                          | S6           |
| <b>2. Results</b>                                                                                                                                                                                                                                              |              |
| <b>Table S3:</b> Summary statistics of detected fluoxetine concentrations (ng/L) in water samples from low- and high-fluoxetine exposure treatments. We found no water contamination in control mesocosms.                                                     | S7           |
| <b>Figure S1:</b> Mean ( $\pm$ SE) detected fluoxetine concentrations (ng/L) in water samples from low- and high-fluoxetine exposure treatments at each sampling date. Smaller shapes represent concentrations detected for individual mesocosms at each date. | S8           |
| <b>Table S4:</b> Summary statistics of detected fluoxetine concentrations (ng/g) in macroinvertebrate tissue samples from low- and high-fluoxetine exposure treatments. We detected no fluoxetine in macroinvertebrate tissue from control mesocosms.          | S9           |
| <b>Table S6:</b> Model parameter estimates for mosquitofish standard length.                                                                                                                                                                                   | S10          |
| <b>Table S7:</b> Model parameter estimates for mosquitofish weight.                                                                                                                                                                                            | S10          |
| <b>Table S8:</b> Model parameter estimates for mosquitofish body condition.                                                                                                                                                                                    | S10          |
| <b>Table S9:</b> Summary of zooplankton taxa found in each treatment and at each stage of the experiment. Data are limited to the top 5 most abundant taxon found per experimental stage.                                                                      | S11          |
| <b>Table S10:</b> Model parameter estimates for total zooplankton abundance. Values are on the log-scale.                                                                                                                                                      | S12          |

|                                                                                                                                                              |            |
|--------------------------------------------------------------------------------------------------------------------------------------------------------------|------------|
| <b>Table S11:</b> Summary statistics for biofilm chlorophyll <i>a</i> concentrations (mg/m <sup>2</sup> ) for each treatment and experimental stage.         | <b>S13</b> |
| <b>Table S12:</b> Summary statistics for biofilm gross primary productivity (mgO <sub>2</sub> /m <sup>2</sup> /h) for each treatment and experimental stage. | <b>S14</b> |
| <b>Table S13:</b> Summary statistics for biofilm community respiration (mgO <sub>2</sub> /m <sup>2</sup> /h) for each treatment and experimental stage.      | <b>S15</b> |
| <b>Table S14:</b> Model parameter estimates for biofilm chlorophyll <i>a</i> concentration (mg/m <sup>2</sup> ).                                             | <b>S16</b> |
| <b>Table S15:</b> Model parameter estimates for biofilm gross primary productivity (mgO <sub>2</sub> /m <sup>2</sup> /h).                                    | <b>S17</b> |
| <b>Table S16:</b> Model parameter estimates for biofilm community respiration (mgO <sub>2</sub> /m <sup>2</sup> /h).                                         | <b>S18</b> |
| <b>Table S17:</b> Summary statistics for seston chlorophyll <i>a</i> concentration (mg/L) for each treatment and experimental stage.                         | <b>S19</b> |
| <b>Table S18:</b> Summary statistics for seston gross primary productivity (mgO <sub>2</sub> /L/h) for each treatment and experimental stage.                | <b>S20</b> |
| <b>Table S19:</b> Summary statistics for seston community respiration (mgO <sub>2</sub> /L/h) for each treatment and experimental stage.                     | <b>S21</b> |
| <b>Table S20:</b> Model parameter estimates for seston chlorophyll <i>a</i> concentration (mg/L).                                                            | <b>S22</b> |
| <b>Table S21:</b> Model parameter estimates for seston gross primary productivity (mgO <sub>2</sub> /L/h).                                                   | <b>S23</b> |
| <b>Table S22:</b> Model parameter estimates for seston community respiration (mgO <sub>2</sub> /L/h).                                                        | <b>S24</b> |
| <b>Table S23:</b> Mean (± standard deviation) concentrations of nutrients (mg L <sup>-1</sup> ) among treatments and experimental stages.                    | <b>S25</b> |

NH<sub>3</sub> = ammonia, FRP = filterable reactive phosphorus, NO<sub>x</sub> = nitric oxide, <LOQ = below limit of quantification.

**Figure S2:** Measured NH<sub>3</sub> (ammonia) concentrations (mg L<sup>-1</sup>) in water samples taken from control (blue), low-fluoxetine (yellow) and high-fluoxetine (red) mesocosm throughout the experiment. **S26**

**Table S24:** Model parameter estimates for ammonia concentrations (mg/L). Values are on the log-scale. **S27**

**Table S25:** Model parameter estimates for filterable reactive phosphorus concentrations (mg/L). Values are on the log scale. **S28**

**Table S25:** Model parameter estimates for filterable reactive phosphorus concentrations (mg/L). Values are on the log scale. **S29**

---

## 1. Supplementary methods

**Table S1:** Mean ( $\pm$  standard deviation) temperature (Temp, °C), pH and dissolved oxygen (DO, mg/L) for each treatment and stage of the experiment.

|             | <b>Treatment</b> | <b>Establishment</b> | <b>Mosquitofish introduction</b> | <b>Fluoxetine introduction</b> | <b>Post-fish removal</b> |
|-------------|------------------|----------------------|----------------------------------|--------------------------------|--------------------------|
| <b>Temp</b> | Control          | 14.82 $\pm$ 3.24     | 17.12 $\pm$ 2.28                 | 22.41 $\pm$ 1.23               | 21.46 $\pm$ 1.94         |
|             | Low              | 14.79 $\pm$ 3.22     | 17.16 $\pm$ 2.09                 | 22.62 $\pm$ 1.58               | 21.80 $\pm$ 2.26         |
|             | High             | 14.74 $\pm$ 3.16     | 17.25 $\pm$ 2.09                 | 22.97 $\pm$ 1.37               | 22.12 $\pm$ 2.31         |
| <b>pH</b>   | Control          | 7.85 $\pm$ 0.51      | 10.05 $\pm$ 0.97                 | 6.71 $\pm$ 0.23                | 7.27 $\pm$ 0.35          |
|             | Low              | 7.88 $\pm$ 0.47      | 9.94 $\pm$ 0.93                  | 7.04 $\pm$ 0.23                | 7.56 $\pm$ 0.42          |
|             | High             | 7.87 $\pm$ 0.50      | 9.87 $\pm$ 1.00                  | 7.36 $\pm$ 0.14                | 7.45 $\pm$ 0.52          |
| <b>DO</b>   | Control          | 10.20 $\pm$ 1.84     | 9.90 $\pm$ 1.37                  | 6.45 $\pm$ 0.48                | 6.92 $\pm$ 0.84          |
|             | Low              | 9.98 $\pm$ 1.67      | 10.06 $\pm$ 1.05                 | 6.72 $\pm$ 0.66                | 7.15 $\pm$ 1.16          |
|             | High             | 10.09 $\pm$ 1.36     | 10.06 $\pm$ 1.34                 | 6.84 $\pm$ 0.51                | 6.62 $\pm$ 1.21          |

**Table S2:** Model structure, number of observations (n) and prior specification for each model in our analysis.

| <b>Outcome</b>                       | <b>Structure</b>                                                         | <b>n</b> | <b>Prior</b>                                                                |
|--------------------------------------|--------------------------------------------------------------------------|----------|-----------------------------------------------------------------------------|
| Fish standard length                 | Treatment * Stage + (1 Mesocosm)                                         | 120      | Intercept = normal(0, 1)<br>B = normal(0,1)<br>Sigma = exponential(1)       |
| Fish body weight                     | Treatment * Stage + (1 Mesocosm)                                         | 125      | Intercept = normal(0, 1)<br>B = normal(0, 1)<br>Sigma = exponential(1)      |
| Fish body condition                  | Treatment * Stage + (1 Mesocosm)                                         | 120      | Intercept = normal(0, 1)<br>B = normal(0, 1)<br>Sigma = exponential(1)      |
| Zooplankton abundance                | Treatment * Stage + Sample date + Std average fish length + (1 Mesocosm) | 84       | Intercept = normal(4.5, 1)<br>B = normal(0, 1)<br>Shape = gamma(0.01, 0.01) |
| Chlorophyll a (biofilm)              | Treatment * Stage + Sample date + Std average fish length + (1 Mesocosm) | 84       | Intercept = normal(5, 3)<br>B = normal(0, 1)<br>Sigma = exponential(1)      |
| Gross primary productivity (biofilm) | Treatment * Stage + Sample date + Std average fish length + (1 Mesocosm) | 84       | Intercept = normal(10, 5)<br>B = normal(0, 1)<br>Sigma = exponential(1)     |
| Community respiration (biofilm)      | Treatment * Stage + Sample date + Std average fish length + (1 Mesocosm) | 71       | Intercept = normal(3, 1)<br>B = normal(0, 1)<br>Sigma = exponential(1)      |
| Chlorophyll a (seston)               | Treatment * Stage + Sample date + Std average fish length + (1 Mesocosm) | 84       | Intercept = normal(1, 0.5)<br>B = normal(0, 0.3)<br>Sigma = exponential(1)  |
| Gross primary productivity (seston)  | Treatment * Stage + Sample date + Std average fish length + (1 Mesocosm) | 84       | Intercept = normal(1, 0.5)<br>B = normal(0, 0.3)<br>Sigma = exponential(1)  |
| Community respiration (seston)       | Treatment * Stage + Sample date + Std average fish length + (1 Mesocosm) | 72       | Intercept = normal(1, 0.5)<br>B = normal(0, 0.3)<br>Sigma = exponential(1)  |
| Aerobic respiration                  | Treatment * Stage + Sample date + Std average fish length + (1 Mesocosm) | 144      | Intercept = normal(0, 1)<br>B = normal(0, 1)<br>Sigma = exponential(1)      |
| Ammonia (NH <sub>3</sub> )           | Treatment * Stage + Sample date + Std average fish length + (1 Mesocosm) | 48       | Intercept = normal(0, 1)<br>B = normal(0, 1)<br>Sigma = exponential(1)      |
| Filterable reactive phosphorus (FRP) | Treatment * Stage + Sample date + Std average fish length + (1 Mesocosm) | 48       | Intercept = normal(0, 1)<br>B = normal(0, 1)<br>Sigma = exponential(1)      |

## 2. Supplementary results

**Table S3:** Summary statistics of detected fluoxetine concentrations (ng/L) in water samples from low- and high-fluoxetine exposure treatments. We found no water contamination in control mesocosms.

| <b>Treatment</b> | <b>Stage</b>            | <b>Mean</b> | <b>SD</b> | <b>n</b> | <b>Min</b> | <b>Max</b> |
|------------------|-------------------------|-------------|-----------|----------|------------|------------|
| <b>Low</b>       | Fluoxetine introduction | 9.57        | 4.02      | 12       | 5.2        | 19         |
|                  | Post-fish removal       | 13.05       | 11.38     | 8        | 5.4        | 39         |
| <b>High</b>      | Fluoxetine introduction | 123.58      | 78.14     | 12       | 33.0       | 310        |
|                  | Post-fish removal       | 112.00      | 47.46     | 8        | 43.0       | 200        |



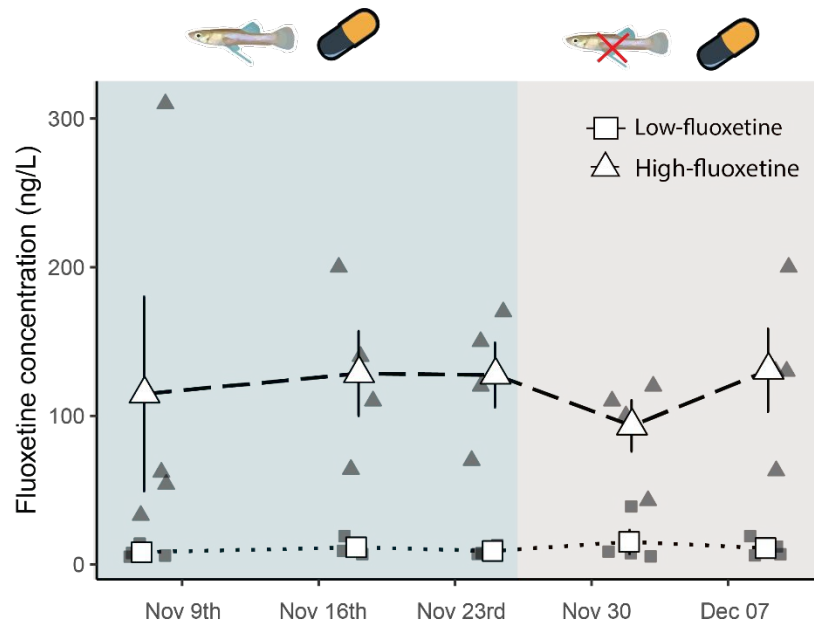

**Figure S1:** Mean ( $\pm$  SE) detected fluoxetine concentrations (ng/L) in water samples from low- and high-fluoxetine exposure treatments at each sampling date. Smaller shapes represent concentrations detected for individual mesocosms at each date.

**Table S4:** Summary statistics of detected fluoxetine concentrations (ng/g) in macroinvertebrate tissue samples from low- and high-fluoxetine exposure treatments. We detected no fluoxetine in macroinvertebrate tissue from control mesocosms.

| <b>Treatment</b> | <b>Family</b> | <b>Mean</b> | <b>SD</b> | <b>n</b> | <b>Min</b> | <b>Max</b> |
|------------------|---------------|-------------|-----------|----------|------------|------------|
| <b>Low</b>       | Chironomidae  | 6.56        | 5.85      | 2        | 2.42       | 10.69      |
|                  | Corixidae     | 14.35       | 7.46      | 4        | 8.77       | 24.85      |
|                  | Notonectidae  | NA          | NA        | 0        | NA         | NA         |
|                  | Physidae      | 10.02       | 4.77      | 3        | 6.81       | 15.49      |
| <b>High</b>      | Chironomidae  | 150.13      | 51.18     | 3        | 115.66     | 208.93     |
|                  | Corixidae     | 220.96      | 250.32    | 2        | 43.96      | 397.97     |
|                  | Notonectidae  | 43.86       | 52.07     | 3        | 12.41      | 103.96     |
|                  | Physidae      | 134.10      | 105.11    | 4        | 58.56      | 289.60     |

**Table S5:** Summary statistics of mosquitofish standard length (mm), body weight (g) and body condition (mass scaled index) before introduction to the mesocosms and after removal from the mesocosms.

| <b>Size metric</b>     | <b>Stage</b> | <b>Treatment</b> | <b>Mean</b> | <b>SD</b> | <b>n</b> | <b>Min</b> | <b>Max</b> |
|------------------------|--------------|------------------|-------------|-----------|----------|------------|------------|
| <b>Standard length</b> | Before       | Control          | 26.32       | 3.55      | 20       | 20.08      | 32.26      |
|                        |              | Low              | 27.62       | 4.12      | 20       | 20.09      | 34.41      |
|                        |              | High             | 25.07       | 3.17      | 20       | 18.06      | 29.57      |
|                        | After        | Control          | 27.90       | 2.95      | 20       | 22.16      | 32.89      |
|                        |              | Low              | 29.14       | 3.33      | 20       | 22.58      | 34.74      |
|                        |              | High             | 29.09       | 4.06      | 20       | 20.68      | 36.44      |
| <b>Body weight</b>     | Before       | Control          | 0.15        | 0.03      | 21       | 0.09       | 0.21       |
|                        |              | Low              | 0.15        | 0.04      | 22       | 0.09       | 0.24       |
|                        |              | High             | 0.15        | 0.03      | 22       | 0.11       | 0.21       |
|                        | After        | Control          | 0.18        | 0.03      | 20       | 0.12       | 0.24       |
|                        |              | Low              | 0.18        | 0.04      | 20       | 0.13       | 0.26       |
|                        |              | High             | 0.18        | 0.02      | 20       | 0.14       | 0.22       |
| <b>Body condition</b>  | Before       | Control          | 0.160       | 0.030     | 20       | 0.007      | 0.117      |
|                        |              | Low              | 0.157       | 0.04      | 22       | 0.09       | 0.24       |
|                        |              | High             | 0.168       | 0.038     | 20       | 0.008      | 0.127      |
|                        | After        | Control          | 0.173       | 0.020     | 20       | 0.004      | 0.131      |
|                        |              | Low              | 0.167       | 0.028     | 20       | 0.006      | 0.123      |
|                        |              | High             | 0.168       | 0.025     | 20       | 0.006      | 0.132      |

**Table S6:** Model parameter estimates for mosquitofish standard length.

| <b>Parameters</b>              | <b>Estimate</b> | <b>Est.Error</b> | <b>l-95% CI</b> | <b>u-95% CI</b> |
|--------------------------------|-----------------|------------------|-----------------|-----------------|
| Intercept                      | 26.31           | 1.42             | 23.44           | 29.11           |
| Treatment (Low)                | 1.33            | 2.03             | -2.67           | 5.31            |
| Treatment (High)               | -1.25           | 2.00             | -5.17           | 2.71            |
| Stage (Post)                   | 1.60            | 0.96             | -0.31           | 3.46            |
| Treatment (Low): Stage (Post)  | -0.07           | 1.36             | -2.69           | 2.69            |
| Treatment (High): Stage (Post) | 2.40            | 1.32             | -0.16           | 4.99            |

**Table S7:** Model parameter estimates for mosquitofish weight.

| <b>Parameters</b>              | <b>Estimate</b> | <b>Est.Error</b> | <b>l-95% CI</b> | <b>u-95% CI</b> |
|--------------------------------|-----------------|------------------|-----------------|-----------------|
| Intercept                      | 0.1474          | 0.0080           | 0.1310          | 0.1634          |
| Treatment (Low)                | 0.0059          | 0.0111           | -0.0157         | 0.0282          |
| Treatment (High)               | -0.0011         | 0.0113           | -0.0238         | 0.0213          |
| Stage (Post)                   | 0.0284          | 0.0099           | 0.0089          | 0.0478          |
| Treatment (Low): Stage (Post)  | 0.0006          | 0.0138           | -0.0263         | 0.0285          |
| Treatment (High): Stage (Post) | 0.0050          | 0.0138           | -0.0229         | 0.0322          |

**Table S8:** Model parameter estimates for mosquitofish body condition.

| <b>Parameters</b>              | <b>Estimate</b> | <b>Est.Error</b> | <b>l-95% CI</b> | <b>u-95% CI</b> |
|--------------------------------|-----------------|------------------|-----------------|-----------------|
| Intercept                      | 0.1599          | 0.0147           | 0.1315          | 0.1895          |
| Treatment (Low)                | -0.0033         | 0.0208           | -0.0454         | 0.0382          |
| Treatment (High)               | 0.0083          | 0.0208           | -0.0339         | 0.0485          |
| Stage (Post)                   | 0.0127          | 0.0076           | -0.0021         | 0.0281          |
| Treatment (Low): Stage (Post)  | -0.0030         | 0.0106           | -0.0242         | 0.0176          |
| Treatment (High): Stage (Post) | -0.0130         | 0.0106           | -0.0339         | 0.0078          |

**Stage:** Post = Post-mosquitofish removal from the mesocosms

**Table S9:** Summary of zooplankton taxa found in each treatment and at each stage of the experiment. Data are limited to the top 5 most abundant taxon found per experimental stage.

| Treatment      | Stage                     | N. taxa | Abundance | Taxon       | N   |
|----------------|---------------------------|---------|-----------|-------------|-----|
| <b>Control</b> | Establishment             | 4       | 84        | Copepoda    | 77  |
|                |                           |         |           | Cyclopoida  | 4   |
|                |                           |         |           | Calanoida   | 2   |
|                |                           |         |           | Ostracoda   | 2   |
|                |                           |         |           | Cladocera   | 1   |
|                | Fish introduction         | 3       | 60        | Copepoda    | 57  |
|                |                           |         |           | Calanoida   | 2   |
|                |                           |         |           | Cyclopoida  | 2   |
|                |                           |         |           | Ostracoda   | 1   |
|                |                           |         |           | Collembolla | 1   |
|                | Fluoxetine introduction   | 5       | 133       | Copepoda    | 123 |
|                |                           |         |           | Cyclopoida  | 7   |
|                |                           |         |           | Cladocera   | 2   |
|                |                           |         |           | Ostracoda   | 2   |
|                |                           |         |           | Hyrdidae    | 1   |
|                | Post-mosquitofish removal | 5       | 323       | Copepoda    | 308 |
| Cyclopoida     |                           |         |           | 8           |     |
| Ostracoda      |                           |         |           | 4           |     |
| Cladocera      |                           |         |           | 3           |     |
| Calanoida      |                           |         |           | 1           |     |
| <b>Low</b>     | Establishment             | 5       | 103       | Copepoda    | 93  |
|                |                           |         |           | Cyclopoida  | 5   |
|                |                           |         |           | Calanoida   | 4   |
|                |                           |         |           | Ostracoda   | 2   |
|                |                           |         |           | Arachnida   | 1   |
|                | Fish introduction         | 4       | 63        | Copepoda    | 59  |
|                |                           |         |           | Calanoida   | 2   |
|                |                           |         |           | Cyclopoida  | 2   |
|                |                           |         |           | Oligochaeta | 1   |
|                | Fluoxetine introduction   | 4       | 131       | Ostracoda   | 1   |
|                |                           |         |           | Copepoda    | 124 |
|                |                           |         |           | Cyclopoida  | 5   |
|                |                           |         |           | Cladocera   | 2   |
|                | Post-mosquitofish removal | 5       | 164       | Calanoida   | 1   |
|                |                           |         |           | Ostracoda   | 1   |
|                |                           |         |           | Copepoda    | 152 |
| Cyclopoida     |                           |         |           | 6           |     |
| Cladocera      |                           |         |           | 3           |     |
|                |                           |         |           | Calanoida   | 2   |
|                |                           |         |           | Ostracoda   | 1   |

| Treatment   | Stage                     | N. taxa | Abundance | Taxon       | N   |
|-------------|---------------------------|---------|-----------|-------------|-----|
| <b>High</b> | Establishment             | 3       | d66       | Copepoda    | 60  |
|             |                           |         |           | Cyclopoida  | 3   |
|             |                           |         |           | Calanoida   | 2   |
|             |                           |         |           | Ostracoda   | 2   |
|             |                           |         |           | Collembolla | 1   |
|             | Fish introduction         | 4       | 66        | Copepoda    | 62  |
|             |                           |         |           | Calanoida   | 2   |
|             |                           |         |           | Cyclopoida  | 2   |
|             |                           |         |           | Diptera     | 2   |
|             |                           |         |           | Ostracoda   | 1   |
|             | Fluoxetine introduction   | 4       | 145       | Copepoda    | 130 |
|             |                           |         |           | Cyclopoida  | 9   |
|             |                           |         |           | Cladocera   | 4   |
|             |                           |         |           | Nematode    | 1   |
|             |                           |         |           | Oligochaeta | 1   |
|             | Post-mosquitofish removal | 6       | 168       | Copepoda    | 147 |
|             |                           |         |           | Cyclopoida  | 14  |
| Calanoida   |                           |         |           | 5           |     |
| Cladocera   |                           |         |           | 2           |     |
| Ostracoda   |                           |         |           | 1           |     |

**Table S10:** Model parameter estimates for total zooplankton abundance. Values are on the log-scale.

| <b>Parameters</b>                      | <b>Estimate</b> | <b>Est.Error</b> | <b>l-95% CI</b> | <b>u-95% CI</b> |
|----------------------------------------|-----------------|------------------|-----------------|-----------------|
| Intercept                              | 5.05            | 0.37             | 4.35            | 5.79            |
| Stage (Fish intro)                     | -0.96           | 0.30             | -1.53           | -0.39           |
| Stage (Flx intro)                      | -0.23           | 0.41             | -1.03           | 0.61            |
| Stage (Fish removal)                   | 0.63            | 0.56             | -0.48           | 1.75            |
| Treatment (Low)                        | 0.13            | 0.37             | -0.60           | 0.87            |
| Treatment (High)                       | -0.18           | 0.38             | -0.92           | 0.58            |
| Sample week                            | 0.00            | 0.10             | -0.20           | 0.20            |
| Average fish length                    | -0.16           | 0.13             | -0.42           | 0.10            |
| Stage (Fish intro): Treatment (Low)    | 0.00            | 0.39             | -0.76           | 0.75            |
| Stage (Flx intro): Treatment (Low)     | -0.09           | 0.40             | -0.87           | 0.71            |
| Stage (Fish removal): Treatment (Low)  | -0.65           | 0.39             | -1.40           | -0.13           |
| Stage (Fish intro): Treatment (High)   | 0.21            | 0.40             | -0.57           | 0.98            |
| Stage (Flx intro): Treatment (High)    | 0.15            | 0.39             | -0.64           | 0.93            |
| Stage (Fish removal): Treatment (High) | -0.37           | 0.39             | -1.14           | 0.39            |

**Stages:** Fish intro = Mosquitofish introduction; Flx intro = Fluoxetine introduction; Fish removal = post-mosquitofish removal.

**Table S11:** Summary statistics for biofilm chlorophyll *a* concentrations (mg/m<sup>2</sup>) for each treatment and experimental stage.

| <b>Treatment</b> | <b>Stage</b>              | <b>Mean</b> | <b>SD</b> | <b>n</b> | <b>Min</b> | <b>Max</b> |
|------------------|---------------------------|-------------|-----------|----------|------------|------------|
| <b>Control</b>   | Establishment             | 2.83        | 0.75      | 4        | 2.13       | 3.84       |
|                  | Fish introduction         | 6.55        | 2.96      | 8        | 1.70       | 9.45       |
|                  | Fluoxetine introduction   | 4.06        | 3.58      | 8        | 0.11       | 9.46       |
|                  | Post-mosquitofish removal | 1.23        | 0.85      | 8        | 0.26       | 2.47       |
| <b>Low</b>       | Establishment             | 3.68        | 1.61      | 4        | 2.32       | 5.64       |
|                  | Fish introduction         | 12.54       | 4.94      | 8        | 6.42       | 19.53      |
|                  | Fluoxetine introduction   | 4.97        | 2.64      | 8        | 1.10       | 9.24       |
|                  | Post-mosquitofish removal | 6.73        | 5.43      | 8        | 1.39       | 15.90      |
| <b>High</b>      | Establishment             | 3.70        | 1.15      | 4        | 2.46       | 5.24       |
|                  | Fish introduction         | 11.07       | 2.71      | 8        | 7.35       | 15.16      |
|                  | Fluoxetine introduction   | 4.23        | 3.04      | 8        | 0.88       | 9.59       |
|                  | Post-mosquitofish removal | 5.22        | 4.83      | 8        | 0.19       | 13.32      |



**Table S12:** Summary statistics for biofilm gross primary productivity (mgO<sub>2</sub>/m<sup>2</sup>/h) for each treatment and experimental stage.

| <b>Treatment</b> | <b>Stage</b>              | <b>Mean</b> | <b>SD</b> | <b>n</b> | <b>Min</b> | <b>Max</b> |
|------------------|---------------------------|-------------|-----------|----------|------------|------------|
| <b>Control</b>   | Establishment             | 4.76        | 12.44     | 4        | -7.24      | 20.81      |
|                  | Fish introduction         | 22.64       | 15.36     | 8        | -1.18      | 40.15      |
|                  | Fluoxetine introduction   | 16.49       | 15.17     | 8        | -3.05      | 36.47      |
|                  | Post-mosquitofish removal | 0.92        | 6.88      | 8        | -13.12     | 8.84       |
| <b>Low</b>       | Establishment             | 12.21       | 6.05      | 4        | 4.11       | 17.06      |
|                  | Fish introduction         | 43.46       | 10.74     | 8        | 23.77      | 57.15      |
|                  | Fluoxetine introduction   | 29.60       | 11.19     | 8        | 8.85       | 44.37      |
|                  | Post-mosquitofish removal | 21.11       | 19.46     | 8        | -6.38      | 51.85      |
| <b>High</b>      | Establishment             | 12.46       | 16.57     | 4        | -7.49      | 26.10      |
|                  | Fish introduction         | 32.90       | 11.28     | 8        | 19.33      | 52.98      |
|                  | Fluoxetine introduction   | 18.75       | 13.95     | 8        | 1.29       | 42.54      |
|                  | Post-mosquitofish removal | 28.58       | 29.68     | 8        | -2.48      | 66.87      |

**Table S13:** Summary statistics for biofilm community respiration ( $\text{mgO}_2/\text{m}^2/\text{h}$ ) for each treatment and experimental stage.

| <b>Treatment</b> | <b>Stage</b>              | <b>Mean</b> | <b>SD</b> | <b>n</b> | <b>Min</b> | <b>Max</b> |
|------------------|---------------------------|-------------|-----------|----------|------------|------------|
| <b>Control</b>   | Fish introduction         | 5.37        | 5.95      | 8        | 0.43       | 17.03      |
|                  | Fluoxetine introduction   | 21.21       | 11.35     | 8        | 2.98       | 43.12      |
|                  | Post-mosquitofish removal | 4.12        | 4.45      | 8        | 0.04       | 13.70      |
| <b>Low</b>       | Fish introduction         | 11.88       | 11.92     | 8        | 1.22       | 40.43      |
|                  | Fluoxetine introduction   | 23.35       | 21.73     | 7        | 0.37       | 47.87      |
|                  | Post-mosquitofish removal | 9.76        | 8.94      | 8        | 0.10       | 28.50      |
| <b>High</b>      | Fish introduction         | 11.19       | 7.39      | 8        | 1.99       | 23.32      |
|                  | Fluoxetine introduction   | 16.08       | 11.79     | 8        | 5.28       | 40.33      |
|                  | Post-mosquitofish removal | 6.53        | 10.01     | 8        | 0.22       | 26.32      |

**Table S14:** Model parameter estimates for biofilm chlorophyll *a* concentration (mg/m<sup>2</sup>).

| Parameters                             | Estimate | Est.Error | l-95% CI | u-95% CI |
|----------------------------------------|----------|-----------|----------|----------|
| Intercept                              | 6.82     | 1.94      | 3.05     | 10.64    |
| Stage (Fish intro)                     | 7.14     | 1.63      | 3.94     | 10.29    |
| Stage (Flx intro)                      | 7.03     | 2.39      | 2.38     | 11.71    |
| Stage (Fish removal)                   | 7.92     | 3.31      | 1.51     | 14.36    |
| Treatment (Low)                        | -0.20    | 2.35      | -4.62    | 4.56     |
| Treatment (High)                       | 0.23     | 2.28      | -4.36    | 4.74     |
| Sample week                            | -1.74    | 0.55      | -2.81    | -0.67    |
| Average fish length                    | 0.90     | 0.74      | -0.49    | 2.40     |
| Stage (Fish intro): Treatment (Low)    | 3.54     | 1.99      | -0.27    | 7.58     |
| Stage (Flx intro): Treatment (Low)     | 1.14     | 2.03      | -2.80    | 5.12     |
| Stage (Fish removal): Treatment (Low)  | 5.93     | 2.02      | 1.98     | 9.79     |
| Stage (Fish intro): Treatment (High)   | 2.14     | 1.99      | -1.79    | 5.91     |
| Stage (Flx intro): Treatment (High)    | 0.18     | 2.04      | -3.79    | 4.20     |
| Stage (Fish removal): Treatment (High) | 2.74     | 1.98      | -1.10    | 6.62     |

**Stages:** Fish intro = Mosquitofish introduction; Flx intro = Fluoxetine introduction; Fish removal = post-mosquitofish removal.

**Table S15:** Model parameter estimates for biofilm gross primary productivity (mgO<sub>2</sub>/m<sup>2</sup>/h).

| <b>Parameters</b>                      | <b>Estimate</b> | <b>Est.Error</b> | <b>l-95% CI</b> | <b>u-95% CI</b> |
|----------------------------------------|-----------------|------------------|-----------------|-----------------|
| Intercept                              | 10.23           | 5.64             | -1.14           | 21.16           |
| Stage (Fish intro)                     | 16.11           | 3.91             | 8.61            | 23.86           |
| Stage (Flx intro)                      | 11.27           | 4.90             | 1.42            | 20.72           |
| Stage (Fish removal)                   | -0.10           | 6.70             | -13.48          | 12.87           |
| Treatment (Low)                        | 3.49            | 5.99             | -8.53           | 15.12           |
| Treatment (High)                       | 3.00            | 5.97             | -8.90           | 14.27           |
| Sample week                            | -0.78           | 1.29             | -3.29           | 1.73            |
| Average fish length                    | 5.00            | 2.83             | -0.71           | 10.62           |
| Stage (Fish intro): Treatment (Low)    | 7.09            | 5.19             | -3.02           | 17.01           |
| Stage (Flx intro): Treatment (Low)     | 7.14            | 5.02             | -2.93           | 16.78           |
| Stage (Fish removal): Treatment (Low)  | 9.33            | 5.06             | 0.82            | 19.06           |
| Stage (Fish intro): Treatment (High)   | 3.69            | 5.16             | -6.42           | 13.91           |
| Stage (Flx intro): Treatment (High)    | -1.48           | 5.09             | -11.40          | 8.55            |
| Stage (Fish removal): Treatment (High) | 10.06           | 5.15             | 0.05            | 20.04           |

**Stages:** Fish intro = Mosquitofish introduction; Flx intro = Fluoxetine introduction; Fish removal = post-mosquitofish removal.

**Table S16:** Model parameter estimates for biofilm community respiration (mgO<sub>2</sub>/m<sup>2</sup>/h).

| <b>Parameters</b>                      | <b>Estimate</b> | <b>Est.Error</b> | <b>l-95% CI</b> | <b>u-95% CI</b> |
|----------------------------------------|-----------------|------------------|-----------------|-----------------|
| Intercept                              | 0.64            | 0.83             | -0.96           | 2.31            |
| Stage (Flx intro)                      | 0.83            | 0.50             | -0.13           | 1.85            |
| Stage (Fish removal)                   | -2.07           | 0.74             | -3.46           | -0.55           |
| Treatment (Low)                        | 0.52            | 0.49             | -0.43           | 1.53            |
| Treatment (High)                       | 0.29            | 0.48             | -0.69           | 1.25            |
| Sample week                            | 0.49            | 0.19             | 0.10            | 0.87            |
| Average fish length                    | 0.37            | 0.20             | -0.02           | 0.76            |
| Stage (Flx intro): Treatment (Low)     | -0.24           | 0.61             | -1.42           | 0.97            |
| Stage (Fish removal): Treatment (Low)  | -0.20           | 0.59             | -1.38           | 0.95            |
| Stage (Flx intro): Treatment (High)    | -0.40           | 0.57             | -1.51           | 0.77            |
| Stage (Fish removal): Treatment (High) | -0.55           | 0.60             | -1.74           | 0.62            |

**Stages:** Flx intro = Fluoxetine introduction; Fish removal = post-mosquitofish removal.

**Table S17:** Summary statistics for seston chlorophyll *a* concentrations (mg/L) for each treatment and experimental stage.

| <b>Treatment</b> | <b>Stage</b>              | <b>Mean</b> | <b>SD</b> | <b>n</b> | <b>Min</b> | <b>Max</b> |
|------------------|---------------------------|-------------|-----------|----------|------------|------------|
| <b>Control</b>   | Establishment             | 0.06        | 0.10      | 4        | 0.00       | 0.21       |
|                  | Fish introduction         | 0.08        | 0.07      | 8        | 0.00       | 0.21       |
|                  | Fluoxetine introduction   | 0.03        | 0.02      | 8        | 0.00       | 0.06       |
|                  | Post-mosquitofish removal | 0.01        | 0.01      | 8        | -0.02      | 0.02       |
| <b>Low</b>       | Establishment             | 0.06        | 0.08      | 4        | 0.01       | 0.18       |
|                  | Fish introduction         | 0.08        | 0.06      | 8        | 0.00       | 0.17       |
|                  | Fluoxetine introduction   | 0.03        | 0.02      | 8        | 0.01       | 0.06       |
|                  | Post-mosquitofish removal | 0.11        | 0.05      | 8        | 0.01       | 0.18       |
| <b>High</b>      | Establishment             | 0.13        | 0.12      | 4        | 0.02       | 0.26       |
|                  | Fish introduction         | 0.10        | 0.05      | 8        | 0.03       | 0.17       |
|                  | Fluoxetine introduction   | 0.03        | 0.02      | 8        | 0.00       | 0.07       |
|                  | Post-mosquitofish removal | 0.00        | 0.02      | 8        | -0.02      | 0.03       |

**Table S18:** Summary statistics for seston gross primary productivity (mgO<sub>2</sub>/L/h) for each treatment and experimental stage.

| <b>Treatment</b> | <b>Stage</b>              | <b>Mean</b> | <b>SD</b> | <b>n</b> | <b>Min</b> | <b>Max</b> |
|------------------|---------------------------|-------------|-----------|----------|------------|------------|
| <b>Control</b>   | Establishment             | 0.21        | 0.21      | 4        | -0.09      | 0.39       |
|                  | Fish introduction         | 0.27        | 0.19      | 8        | -0.01      | 0.58       |
|                  | Fluoxetine introduction   | -0.03       | 0.18      | 8        | -0.32      | 0.19       |
|                  | Post-mosquitofish removal | 0.11        | 0.14      | 8        | -0.09      | 0.33       |
| <b>Low</b>       | Establishment             | 0.15        | 0.21      | 4        | 0.03       | 0.46       |
|                  | Fish introduction         | 0.21        | 0.15      | 8        | 0.02       | 0.43       |
|                  | Fluoxetine introduction   | -0.07       | 0.17      | 8        | -0.37      | 0.13       |
|                  | Post-mosquitofish removal | 0.12        | 0.25      | 8        | -0.28      | 0.44       |
| <b>High</b>      | Establishment             | 0.14        | 0.09      | 4        | 0.03       | 0.24       |
|                  | Fish introduction         | 0.29        | 0.17      | 8        | 0.01       | 0.53       |
|                  | Fluoxetine introduction   | 0.00        | 0.15      | 8        | -0.24      | 0.13       |
|                  | Post-mosquitofish removal | 0.14        | 0.10      | 8        | 0.03       | 0.31       |

**Table S19:** Summary statistics for seston community respiration (mgO<sub>2</sub>/L/h) for each treatment and experimental stage.

| <b>Treatment</b> | <b>Stage</b>              | <b>Mean</b> | <b>SD</b> | <b>n</b> | <b>Min</b> | <b>Max</b> |
|------------------|---------------------------|-------------|-----------|----------|------------|------------|
| <b>Control</b>   | Fish introduction         | 0.20        | 0.27      | 8        | 0.00       | 0.74       |
|                  | Fluoxetine introduction   | 0.11        | 0.10      | 8        | 0.01       | 0.27       |
|                  | Post-mosquitofish removal | 0.16        | 0.20      | 8        | 0.03       | 0.66       |
| <b>Low</b>       | Fish introduction         | 0.27        | 0.12      | 8        | 0.10       | 0.42       |
|                  | Fluoxetine introduction   | 0.36        | 0.33      | 8        | 0.07       | 1.15       |
|                  | Post-mosquitofish removal | 0.26        | 0.16      | 8        | 0.06       | 0.52       |
| <b>High</b>      | Fish introduction         | 0.02        | 0.01      | 8        | 0.00       | 0.03       |
|                  | Fluoxetine introduction   | 0.01        | 0.01      | 8        | 0.00       | 0.03       |
|                  | Post-mosquitofish removal | 0.01        | 0.02      | 8        | 0.00       | 0.04       |



**Table S20:** Model parameter estimates for seston chlorophyll *a* concentration (mg/L).

| Parameters                             | Estimate | Est.Error | l-95% CI | u-95% CI |
|----------------------------------------|----------|-----------|----------|----------|
| Intercept                              | 0.12     | 0.04      | 0.05     | 0.19     |
| Stage (Fish intro)                     | 0.06     | 0.03      | -0.01    | 0.12     |
| Stage (Flx intro)                      | 0.07     | 0.05      | -0.03    | 0.17     |
| Stage (Fish removal)                   | 0.10     | 0.07      | -0.03    | 0.24     |
| Treatment (Low)                        | 0.00     | 0.04      | -0.07    | 0.07     |
| Treatment (High)                       | 0.07     | 0.04      | -0.01    | 0.14     |
| Sample week                            | -0.03    | 0.01      | -0.05    | -0.01    |
| Average fish length                    | -0.01    | 0.01      | -0.03    | 0.00     |
| Stage (Fish intro): Treatment (Low)    | 0.01     | 0.04      | -0.08    | 0.09     |
| Stage (Flx intro): Treatment (Low)     | 0.00     | 0.04      | -0.08    | 0.09     |
| Stage (Fish removal): Treatment (Low)  | 0.10     | 0.04      | 0.02     | 0.19     |
| Stage (Fish intro): Treatment (High)   | -0.05    | 0.04      | -0.13    | 0.04     |
| Stage (Flx intro): Treatment (High)    | -0.07    | 0.04      | -0.15    | 0.02     |
| Stage (Fish removal): Treatment (High) | -0.07    | 0.04      | -0.15    | 0.01     |

**Stages:** Fish intro = Mosquitofish introduction; Flx intro = Fluoxetine introduction; Fish removal = post-mosquitofish removal.

**Table S21:** Model parameter estimates for seston gross primary productivity (mgO<sub>2</sub>/L/h).

| Parameters                             | Estimate | Est.Error | l-95% CI | u-95% CI |
|----------------------------------------|----------|-----------|----------|----------|
| Intercept                              | 0.26     | 0.11      | 0.06     | 0.48     |
| Stage (Fish intro)                     | 0.13     | 0.08      | -0.03    | 0.29     |
| Stage (Flx intro)                      | -0.10    | 0.12      | -0.33    | 0.13     |
| Stage (Fish removal)                   | 0.11     | 0.16      | -0.21    | 0.42     |
| Treatment (Low)                        | -0.03    | 0.11      | -0.24    | 0.18     |
| Treatment (High)                       | -0.04    | 0.11      | -0.25    | 0.17     |
| Sample week                            | -0.04    | 0.03      | -0.09    | 0.02     |
| Average fish length                    | -0.01    | 0.04      | -0.08    | 0.06     |
| Stage (Fish intro): Treatment (Low)    | -0.02    | 0.11      | -0.23    | 0.20     |
| Stage (Flx intro): Treatment (Low)     | -0.01    | 0.11      | -0.23    | 0.21     |
| Stage (Fish removal): Treatment (Low)  | 0.05     | 0.11      | -0.16    | 0.27     |
| Stage (Fish intro): Treatment (High)   | 0.06     | 0.11      | -0.16    | 0.27     |
| Stage (Flx intro): Treatment (High)    | 0.06     | 0.11      | -0.15    | 0.27     |
| Stage (Fish removal): Treatment (High) | 0.07     | 0.11      | -0.15    | 0.29     |

**Stages:** Fish intro = Mosquitofish introduction; Flx intro = Fluoxetine introduction; Fish removal = post-mosquitofish removal.

**Table S22:** Model parameter estimates for seston community respiration (mgO<sub>2</sub>/L/h).

| Parameters                             | Estimate | Est.Error | l-95% CI | u-95% CI |
|----------------------------------------|----------|-----------|----------|----------|
| Intercept                              | 0.14     | 0.14      | -0.15    | 0.42     |
| Stage (Flx intro)                      | 0.06     | 0.10      | -0.14    | 0.27     |
| Stage (Fish removal)                   | -0.20    | 0.15      | -0.51    | 0.10     |
| Treatment (Low)                        | -0.06    | 0.08      | -0.23    | 0.10     |
| Treatment (High)                       | -0.02    | 0.08      | -0.18    | 0.14     |
| Sample week                            | 0.01     | 0.04      | -0.06    | 0.08     |
| Average fish length                    | 0.00     | 0.02      | -0.05    | 0.05     |
| Stage (Flx intro): Treatment (Low)     | 0.14     | 0.11      | -0.08    | 0.35     |
| Stage (Fish removal): Treatment (Low)  | 0.04     | 0.11      | -0.18    | 0.26     |
| Stage (Flx intro): Treatment (High)    | 0.01     | 0.11      | -0.20    | 0.23     |
| Stage (Fish removal): Treatment (High) | 0.01     | 0.11      | -0.20    | 0.22     |

**Stages:** Flx intro = Fluoxetine introduction; Fish removal = post-mosquitofish removal.

**Table S23:** Mean ( $\pm$  standard deviation) concentrations of nutrients ( $\text{mg L}^{-1}$ ) among treatments and experimental stages.  $\text{NH}_3$  = ammonia, FRP = filterable reactive phosphorus,  $\text{NO}_x$  = nitric oxide, <LOQ = below limit of quantification.

|                       | <b>Treatment</b> | <b>Establishment</b> | <b>Mosquitofish introduction</b> | <b>Fluoxetine introduction</b> | <b>Post-fish removal</b> |
|-----------------------|------------------|----------------------|----------------------------------|--------------------------------|--------------------------|
| <b>NH<sub>3</sub></b> | Control          | 0.0050 $\pm$ 0.0014  | 0.0063 $\pm$ 0.0015              | 0.0448 $\pm$ 0.0530            | 0.0045 $\pm$ 0.0006      |
|                       | Low              | 0.0068 $\pm$ 0.0026  | 0.0060 $\pm$ 0.0018              | 0.0405 $\pm$ 0.0411            | 0.0037 $\pm$ 0.0015      |
|                       | High             | 0.0045 $\pm$ 0.0013  | 0.0060 $\pm$ 0.0014              | 0.0104 $\pm$ 0.0104            | 0.0037 $\pm$ 0.0013      |
| <b>FRP</b>            | Control          | 0.0305 $\pm$ 0.0095  | 0.0025 $\pm$ 0.0006              | 0.0020 $\pm$ 0.0000            | 0.0023 $\pm$ 0.0005      |
|                       | Low              | 0.0330 $\pm$ 0.0048  | 0.0020 $\pm$ 0.0008              | 0.0018 $\pm$ 0.0005            | 0.0020 $\pm$ 0.0000      |
|                       | High             | 0.0257 $\pm$ 0.0161  | 0.0023 $\pm$ 0.0005              | 0.0017 $\pm$ 0.0006            | 0.0020 $\pm$ 0.0000      |
| <b>NO<sub>x</sub></b> | Control          | 1.0500 $\pm$ 0.0577  | <LOQ                             | <LOQ                           | <LOQ                     |
|                       | Low              | 1.1250 $\pm$ 0.0500  | <LOQ                             | <LOQ                           | <LOQ                     |
|                       | High             | 1.0450 $\pm$ 0.0640  | <LOQ                             | <LOQ                           | <LOQ                     |

**Figure S2:** Measured NH<sub>3</sub> (ammonia) concentrations (mg L<sup>-1</sup>) in water samples taken from control (blue), low-fluoxetine (yellow) and high-fluoxetine (red) mesocosm throughout the experiment.

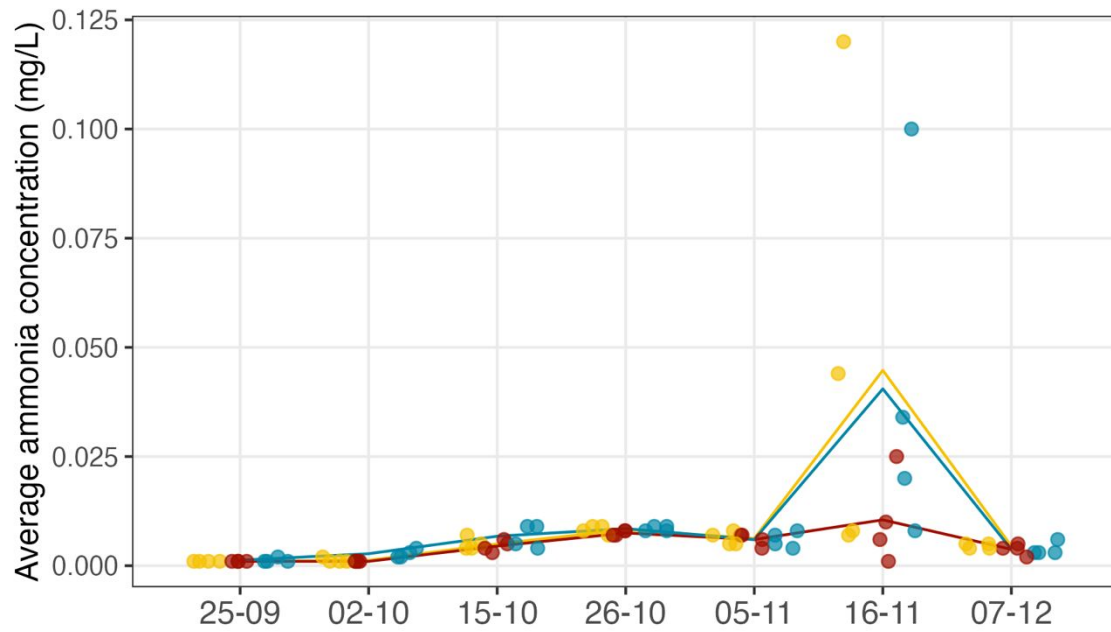

**Table S24:** Model parameter estimates for ammonia concentrations (mg/L). Values are on the log-scale.

| <b>Parameters</b>                      | <b>Estimate</b> | <b>Est.Error</b> | <b>l-95% CI</b> | <b>u-95% CI</b> |
|----------------------------------------|-----------------|------------------|-----------------|-----------------|
| Intercept                              | -2.48           | 0.62             | -3.71           | -1.28           |
| Stage (Fish intro)                     | -0.05           | 0.41             | -0.85           | 0.73            |
| Stage (Flx intro)                      | 0.44            | 0.57             | -0.66           | 1.56            |
| Stage (Fish removal)                   | -0.32           | 0.74             | -1.80           | 1.13            |
| Treatment (Low)                        | 0.07            | 0.22             | -0.36           | 0.50            |
| Treatment (High)                       | -0.08           | 0.22             | -0.52           | 0.33            |
| Sample week                            | 0.07            | 0.19             | -0.31           | 0.45            |
| Average fish length                    | 0.04            | 0.06             | -0.09           | 0.16            |
| Stage (Fish intro): Treatment (Low)    | -0.11           | 0.29             | -0.69           | 0.47            |
| Stage (Flx intro): Treatment (Low)     | 0.00            | 0.29             | -0.55           | 0.56            |
| Stage (Fish removal): Treatment (Low)  | -0.18           | 0.29             | -0.75           | 0.41            |
| Stage (Fish intro): Treatment (High)   | 0.05            | 0.29             | -0.49           | 0.64            |
| Stage (Flx intro): Treatment (High)    | -0.50           | 0.28             | -1.05           | 0.07            |
| Stage (Fish removal): Treatment (High) | -0.02           | 0.29             | -0.57           | 0.57            |

**Stages:** Fish intro = Mosquitofish introduction; Flx intro = Fluoxetine introduction; Fish removal = post-mosquitofish removal.

**Table S25:** Model parameter estimates for filterable reactive phosphorus concentrations (mg/L). Values are on the log scale.

| <b>Parameters</b>                      | <b>Estimate</b> | <b>Est.Error</b> | <b>l-95% CI</b> | <b>u-95% CI</b> |
|----------------------------------------|-----------------|------------------|-----------------|-----------------|
| Intercept                              | -0.50           | 0.59             | -1.65           | 0.66            |
| Stage (Fish intro)                     | -0.40           | 0.39             | -1.15           | 0.34            |
| Stage (Flx intro)                      | -0.15           | 0.58             | -1.27           | 0.97            |
| Stage (Fish removal)                   | 0.23            | 0.77             | -1.26           | 1.73            |
| Treatment (Low)                        | 0.02            | 0.11             | -0.20           | 0.24            |
| Treatment (High)                       | -0.13           | 0.11             | -0.35           | 0.09            |
| Sample week                            | -0.34           | 0.19             | -0.71           | 0.03            |
| Average fish length                    | 0.04            | 0.03             | -0.02           | 0.11            |
| Stage (Fish intro): Treatment (Low)    | -0.16           | 0.14             | -0.43           | 0.10            |
| Stage (Flx intro): Treatment (Low)     | -0.12           | 0.14             | -0.38           | 0.15            |
| Stage (Fish removal): Treatment (Low)  | -0.09           | 0.14             | -0.36           | 0.18            |
| Stage (Fish intro): Treatment (High)   | 0.09            | 0.14             | -0.19           | 0.35            |
| Stage (Flx intro): Treatment (High)    | 0.02            | 0.13             | -0.23           | 0.29            |
| Stage (Fish removal): Treatment (High) | 0.09            | 0.14             | -0.18           | 0.35            |

**Stages:** Fish intro = Mosquitofish introduction; Flx intro = Fluoxetine introduction; Fish removal = post-mosquitofish removal.
